# Supplementary material for: Isolation, synthesis and bioactivity studies of phomactin terpenoids
Source: Springer Nature journal article supplement (doi:10.1038/s41557-018-0084-x), 2018-07-19
Supplement: 41557_2018_84_MOESM7_ESM.mol [file 41557_2018_84_MOESM7_ESM.mol]

nchem.17102265B-comp1.mol
  ChemDraw05171812212D

 24 26  0  0  1  0  0  0  0  0999 V2000
   -0.8458    0.4188    0.0000 C   0  0  0  0  0  0  0  0  0  0  0  0
   -1.3156   -0.9234    0.0000 C   0  0  0  0  0  0  0  0  0  0  0  0
   -1.4290    1.0020    0.0000 C   0  0  0  0  0  0  0  0  0  0  0  0
   -1.4290    0.1770    0.0000 C   0  0  0  0  0  0  0  0  0  0  0  0
   -0.7144   -0.2355    0.0000 C   0  0  0  0  0  0  0  0  0  0  0  0
   -0.0002    0.1770    0.0000 C   0  0  0  0  0  0  0  0  0  0  0  0
   -0.0002    1.0020    0.0000 C   0  0  0  0  0  0  0  0  0  0  0  0
   -0.7144    1.4145    0.0000 C   0  0  0  0  0  0  0  0  0  0  0  0
    1.4287    0.1770    0.0000 C   0  0  0  0  0  0  0  0  0  0  0  0
    1.4287    1.0020    0.0000 C   0  0  0  0  0  0  0  0  0  0  0  0
    0.7144    1.4145    0.0000 C   0  0  0  0  0  0  0  0  0  0  0  0
    1.5203   -1.1995    0.0000 C   0  0  0  0  0  0  0  0  0  0  0  0
    0.7606   -1.5971    0.0000 C   0  0  0  0  0  0  0  0  0  0  0  0
    0.1026   -1.0994    0.0000 C   0  0  0  0  0  0  0  0  0  0  0  0
   -0.6579   -1.4206    0.0000 C   0  0  0  0  0  0  0  0  0  0  0  0
    0.7144    2.2395    0.0000 O   0  0  0  0  0  0  0  0  0  0  0  0
    2.1433    0.5895    0.0000 O   0  0  0  0  0  0  0  0  0  0  0  0
    0.7144   -0.2355    0.0000 O   0  0  0  0  0  0  0  0  0  0  0  0
    2.0120    1.5854    0.0000 H   0  0  0  0  0  0  0  0  0  0  0  0
   -2.1433    1.4145    0.0000 C   0  0  0  0  0  0  0  0  0  0  0  0
   -2.1433   -0.2355    0.0000 C   0  0  0  0  0  0  0  0  0  0  0  0
   -0.7591   -2.2395    0.0000 C   0  0  0  0  0  0  0  0  0  0  0  0
   -0.7144    2.2395    0.0000 C   0  0  0  0  0  0  0  0  0  0  0  0
    2.0119   -0.4062    0.0000 C   0  0  0  0  0  0  0  0  0  0  0  0
  3 20  1  1      
  4 21  1  1      
 15 22  1  0      
  8 23  1  0      
  9 24  1  1      
  1  2  1  0      
  3  4  1  0      
  4  5  1  0      
  5  6  1  0      
  6  7  1  0      
  7  8  2  0      
  8  3  1  0      
  9 10  1  0      
 10 11  1  0      
 11  7  1  0      
  3  1  1  6      
  9 12  1  6      
 12 13  1  0      
 13 14  1  0      
 14 15  2  0      
 15  2  1  0      
 11 16  2  0      
  9 17  1  0      
 17 10  1  0      
  6 18  1  1      
 10 19  1  6      
M  STY  1   1 SUP
M  SLB  1   1   1
M  SAL   1  1  20
M  SBL   1  1   1
M  SMT   1 ^Me
M  SBV   1   1    0.7142   -0.4125
M  STY  1   2 SUP
M  SLB  1   2   2
M  SAL   2  1  21
M  SBL   2  1   2
M  SMT   2 ^Me
M  SBV   2   2    0.7142    0.4125
M  STY  1   3 SUP
M  SLB  1   3   3
M  SAL   3  1  22
M  SBL   3  1   3
M  SMT   3 ^Me
M  SBV   3   3    0.1012    0.8189
M  STY  1   4 SUP
M  SLB  1   4   4
M  SAL   4  1  23
M  SBL   4  1   4
M  SMT   4 Me
M  SBV   4   4    0.0000   -0.8250
M  STY  1   5 SUP
M  SLB  1   5   5
M  SAL   5  1  24
M  SBL   5  1   5
M  SMT   5 Me
M  SBV   5   5   -0.5832    0.5832
M  END
