# Supplementary material for: Isolation, synthesis and bioactivity studies of phomactin terpenoids
Source: Springer Nature journal article supplement (doi:10.1038/s41557-018-0084-x), 2018-07-19
Supplement: 41557_2018_84_MOESM79_ESM.mol [file 41557_2018_84_MOESM79_ESM.mol]

nchem.17102265B-comp23.mol
  ChemDraw05171812212D

 46 47  0  0  1  0  0  0  0  0999 V2000
   -1.4308    0.4442    0.0000 C   0  0  0  0  0  0  0  0  0  0  0  0
   -1.4308   -0.3810    0.0000 C   0  0  0  0  0  0  0  0  0  0  0  0
   -0.7164   -0.7936    0.0000 C   0  0  0  0  0  0  0  0  0  0  0  0
   -0.0012   -0.3810    0.0000 C   0  0  0  0  0  0  0  0  0  0  0  0
   -0.0012    0.4442    0.0000 C   0  0  0  0  0  0  0  0  0  0  0  0
   -0.7164    0.8569    0.0000 C   0  0  0  0  0  0  0  0  0  0  0  0
    1.4280   -0.3810    0.0000 C   0  0  0  0  0  0  0  0  0  0  0  0
    1.4280    0.4442    0.0000 C   0  0  0  0  0  0  0  0  0  0  0  0
    0.7136    0.8569    0.0000 C   0  0  0  0  0  0  0  0  0  0  0  0
    1.5105   -1.4808    0.0000 C   0  0  0  0  0  0  0  0  0  0  0  0
    0.8442   -1.9817    0.0000 C   0  0  0  0  0  0  0  0  0  0  0  0
    0.1295   -1.5691    0.0000 C   0  0  0  0  0  0  0  0  0  0  0  0
   -0.5850   -1.9817    0.0000 C   0  0  0  0  0  0  0  0  0  0  0  0
   -0.7164    1.6821    0.0000 C   0  0  0  0  0  0  0  0  0  0  0  0
    0.7136    1.6821    0.0000 O   0  0  0  0  0  0  0  0  0  0  0  0
   -2.1454    0.0316    0.0000 C   0  0  0  0  0  0  0  0  0  0  0  0
   -1.2996   -1.5691    0.0000 C   0  0  0  0  0  0  0  0  0  0  0  0
    1.4282    2.0947    0.0000 C   0  0  0  0  0  0  0  0  0  0  0  0
    2.1429    1.6821    0.0000 O   0  0  0  0  0  0  0  0  0  0  0  0
    2.8575    2.0947    0.0000 C   0  0  0  0  0  0  0  0  0  0  0  0
    3.5722    1.6821    0.0000 C   0  0  0  0  0  0  0  0  0  0  0  0
    0.7136   -0.7936    0.0000 C   0  0  0  0  0  0  0  0  0  0  0  0
   -2.1456   -0.7936    0.0000 C   0  0  0  0  0  0  0  0  0  0  0  0
   -0.5850   -2.8069    0.0000 C   0  0  0  0  0  0  0  0  0  0  0  0
   -1.6444    1.2413    0.0000 C   0  0  0  0  0  0  0  0  0  0  0  0
   -2.8601    0.4442    0.0000 S   0  0  0  0  0  0  0  0  0  0  0  0
   -3.2717   -0.2687    0.0000 O   0  0  0  0  0  0  0  0  0  0  0  0
   -2.4484    1.1572    0.0000 O   0  0  0  0  0  0  0  0  0  0  0  0
   -3.5731    0.8559    0.0000 C   0  0  0  0  0  0  0  0  0  0  0  0
   -3.5731    1.6792    0.0000 C   0  0  0  0  0  0  0  0  0  0  0  0
   -4.2861    2.0908    0.0000 C   0  0  0  0  0  0  0  0  0  0  0  0
   -4.9991    1.6792    0.0000 C   0  0  0  0  0  0  0  0  0  0  0  0
   -4.9991    0.8559    0.0000 C   0  0  0  0  0  0  0  0  0  0  0  0
   -4.2861    0.4442    0.0000 C   0  0  0  0  0  0  0  0  0  0  0  0
   -2.0143   -1.9818    0.0000 O   0  0  0  0  0  0  0  0  0  0  0  0
   -2.7273   -1.5702    0.0000 Si  0  0  0  0  0  0  0  0  0  0  0  0
   -3.4402   -1.9819    0.0000 C   0  0  0  0  0  0  0  0  0  0  0  0
   -2.3157   -0.8572    0.0000 C   0  0  0  0  0  0  0  0  0  0  0  0
   -3.1390   -0.8572    0.0000 C   0  0  0  0  0  0  0  0  0  0  0  0
   -3.4402   -2.8052    0.0000 C   0  0  0  0  0  0  0  0  0  0  0  0
   -4.1532   -2.3936    0.0000 C   0  0  0  0  0  0  0  0  0  0  0  0
   -4.1533   -1.5703    0.0000 C   0  0  0  0  0  0  0  0  0  0  0  0
    4.2868    2.0947    0.0000 Si  0  0  0  0  0  0  0  0  0  0  0  0
    4.6980    1.3824    0.0000 C   0  0  0  0  0  0  0  0  0  0  0  0
    4.9991    2.5059    0.0000 C   0  0  0  0  0  0  0  0  0  0  0  0
    3.8756    2.8069    0.0000 C   0  0  0  0  0  0  0  0  0  0  0  0
  7 22  1  0      
  2 23  1  1      
 13 24  1  0      
  1 25  1  1      
 33 34  2  0      
 32 33  1  0      
 31 32  2  0      
 30 31  1  0      
 29 30  2  0      
 29 34  1  0      
 26 27  2  0      
 26 28  2  0      
 26 29  1  0      
 16 26  1  0      
 37 40  1  0      
 37 41  1  0      
 37 42  1  0      
 36 37  1  0      
 36 38  1  0      
 36 39  1  0      
 35 36  1  0      
 17 35  1  0      
 43 44  1  0      
 43 45  1  0      
 43 46  1  0      
 21 43  1  0      
  1  2  1  0      
  2  3  1  0      
  3  4  1  0      
  4  5  2  0      
  5  6  1  0      
  6  1  1  0      
  7  8  2  0      
  8  9  1  0      
  9  5  1  0      
  7 10  1  0      
 10 11  1  0      
 11 12  1  0      
 12 13  2  0      
  6 14  2  0      
  9 15  1  4      
  1 16  1  6      
 13 17  1  0      
 15 18  1  0      
 18 19  1  0      
 19 20  1  0      
 20 21  1  0      
M  STY  1   1 SUP
M  SLB  1   1   1
M  SAL   1  1  22
M  SBL   1  1   1
M  SMT   1 ^Me
M  SBV   1   1    0.7144    0.4126
M  STY  1   2 SUP
M  SLB  1   2   2
M  SAL   2  1  23
M  SBL   2  1   2
M  SMT   2 ^Me
M  SBV   2   2    0.7148    0.4126
M  STY  1   3 SUP
M  SLB  1   3   3
M  SAL   3  1  24
M  SBL   3  1   3
M  SMT   3 Me
M  SBV   3   3    0.0000    0.8252
M  STY  1   4 SUP
M  SLB  1   4   4
M  SAL   4  1  25
M  SBL   4  1   4
M  SMT   4 ^Me
M  SBV   4   4    0.2136   -0.7971
M  STY  1   5 SUP
M  SLB  1   5   5
M  SAL   5  9  26  27  28  29  30  31  32  33  34
M  SBL   5  1  14
M  SMT   5 ^SO\s2\nPh
M  SBV   5  14    0.7146   -0.4126
M  STY  1   6 SUP
M  SLB  1   6   6
M  SAL   6  8  35  36  37  38  39  40  41  42
M  SBL   6  1  22
M  SMT   6 ^OTBS
M  SBV   6  22    0.7146    0.4127
M  STY  1   7 SUP
M  SLB  1   7   7
M  SAL   7  4  43  44  45  46
M  SBL   7  1  26
M  SMT   7 TMS
M  SBV   7  26   -0.7146   -0.4126
M  END
